# Supplementary material for: Adolescent total knee arthroplasty
Source: PubMed Central journal article supplement — Arthroplast Today. 2017 Feb 13;3(2):105–9. doi: 10.1016/j.artd.2016.04.002 (PMC5484984; doi:10.1016/j.artd.2016.04.002), 2017-02-13
Supplement: mmc2.pdf [file mmc2.pdf]

# CONFLICT OF INTEREST STATEMENT

## *The Journal of Arthroplasty*

(Adopted from the American Academy of Orthopaedic Surgeons disclosure statement)

The following form **must be filled out completely and submitted by each author (example, 6 authors, 6 forms)**. **If no disclosure is required, please write/type "none" at the end of each sentence.**

### Pediatric Total Knee Arthroplasty

---

Manuscript Title

1. Royalties from a company or supplier (The following conflicts were disclosed) None
  
2. Speakers bureau/paid presentations for a company or supplier (The following conflicts were disclosed)  
none
  
- 3A. Paid employee for a company or supplier (The following conflicts were disclosed) none
  
- 3B. Paid consultant for a company or supplier (The following conflicts were disclosed) none
  
- 3C. Unpaid consultants for a company or supplier (The following conflicts were disclosed) none
  
4. Stock or stock options in a company or supplier (The following conflicts were disclosed) none
  
5. Research support from a company or supplier as a Principal Investigator (The following conflicts were disclosed)  
none
  
6. Other financial or material support from a company or supplier (The following conflicts were disclosed) none
  
7. Royalties, financial or material support from publishers (The following conflicts were disclosed) none
  
8. Medical/Orthopaedic publications editorial/governing board (The following conflicts were disclosed) none
  
9. Board member/committee appointments for a society (The following conflicts were disclosed) none

#### **Each author must sign AND print or type his/her name, date and submit a separate form**

In addition, one BLINDED Conflict of Interest form (no author names used) should be submitted per manuscript with all author disclosures.

Todd A. Milbrandt, M.D.

Author Name (Print or Type)



Author Signature

1-14-2016

Date
